# Supplementary material for: Detection of the Endosomal Sorting Complex Required for Transport inEntamoeba histolyticaand Characterization of the EhVps4 Protein
Source: Hindawi journal article supplement (doi:10.1155/2010/890674), 2010-01-01
Supplement: f2 [file 890674.f2.pdf]

Table T1: Internal primers used in RT-PCR assays.

| Gene             | Amplified    |                     |                               |                                |
|------------------|--------------|---------------------|-------------------------------|--------------------------------|
|                  | product (bp) | T <sub>m</sub> (°C) | Sense primer                  | Antisense primer               |
| <i>Ehhse1</i>    | 530          | 47.5                | 5'-CATATGCAAGCAATGAAAGAT-3'   | 5'-TGATTGTTCAATTTGGTGTGAT-3'   |
| <i>Ehvps27</i>   | 258          | 49                  | 5'-ACTGATGTTAAAATGCCTCCA-3'   | 5'-TTTCTGCTCAGCCAAATAGAT-3'    |
| <i>Ehvps23</i>   | 188          | 50.5                | 5'-GTGTTATTAGGAAAGTTGGCGAT-3' | 5'-ATTATTATGTGGGTTAGGCTGAA-3'  |
| <i>Ehvps37-D</i> | 303          | 49.5                | 5'-TATTACTGCTGGTCCACAAGC-3'   | 5'-GAGTCTGTTGGATTTGTTCCA-3'    |
| <i>Ehvps22</i>   | 436          | 50                  | 5'-TGTCAAAAAGAACAATTGATTTG-3' | 5'-TGATTAATTGCAAAGTGCCTAAT-3'  |
| <i>Ehvps25</i>   | 370          | 45                  | 5'-TGAAACAGTCAGAGTTCAACA-3'   | 5'-AACCAAAAAATTCCATATTCT-3'    |
| <i>Ehvps36</i>   | 449          | 45.5                | 5'-AATCAACCACAATATGGAATT-3'   | 5'-TTGACATTCATTAATCCAACA-3'    |
| <i>Ehvps2</i>    | 426          | 44                  | 5'-AAAAGATTAGAACGTGAAGAA-3'   | 5'-CAACATCTAATCCAATTTTCAG-3'   |
| <i>Ehvps24</i>   | 504          | 44.5                | 5'-AACCTTAATAGCCAAACAGTA-3'   | 5'-GCCTTCTTTTTCACTCATAAC-3'    |
| <i>Ehvps32</i>   | 381          | 47                  | 5'-AGAAAAAGAATGGAGATGGAA-3'   | 5'-TTCTAATTCAGCCAAGTCATC-3'    |
| <i>Ehvps4</i>    | 210          | 55                  | 5'-ATGACATCGTTACTTGATAAAGG-3' | 5'-TCTTTTTAAATATTCTGCCCG-3'    |
| <i>Ehvta1</i>    | 221          | 44                  | 5'-AATTTCCACCAAATATAAAAA-3'   | 5'-TGGTGATTTAGTTGACTCTTT-3'    |
| <i>Ehvps60</i>   | 402          | 44.5                | 5'-ATAGATGAAACTCATGCAATT-3'   | 5'-TTGTGATAAAATGTCACCAAA-3'    |
| <i>Ehdoa4</i>    | 172          | 49                  | 5'-ATGAATTGGTTCAATACAAATCC-3' | 5'-CAACTGCTGCATCATGAATAT-3'    |
| <i>Ehadh112</i>  | 1161         | 55                  | 5'-ATGAATAGACAATTCATTCTTG-3'  | 5'-TTAATTTATAATTCTATTCCCTTC-3' |
| <i>Ehrsp5</i>    | 327          | 47                  | 5'-ATGGAAACACCTCAAATAACA-3'   | 5'-TTCCCACCCTTTAACTACATC-3'    |
| <i>Eh25SrRNA</i> | 330          | 51                  | 5'-TATCAAATCAAAGGACCCGCT-3'   | 5'-AAAAGA AAAACTAAGCGGTAA-3'   |
